# Supplementary material for: Neuroimaging Markers for Studying Gulf-War Illness: Single-Subject Level Analytical Method Based on Machine Learning
Source: PubMed Central journal article supplement (PMC7699718; doi:10.3390/brainsci10110884), 2020-11-20
Supplement: brainsci-10-00884-s001.pdf [file brainsci-10-00884-s001.pdf]

**Table S1. List of key imaging features based on group-level statistical comparison.**

| Measure        | WM tract/GM ROI (statistical significance: FDR-p, t-value)                                                                                                                                                                                                                                                                                                                                                                                                                                                                                                                                                                                                                                                                                                                                                                                                                                                                                                                                                      |                                                                                                                                                                                                                                                                                                                                                                                                                                                                                                                                                                                                                                                                                                                                                                                                                                                                                                                                                                                                                                                                                            |
|----------------|-----------------------------------------------------------------------------------------------------------------------------------------------------------------------------------------------------------------------------------------------------------------------------------------------------------------------------------------------------------------------------------------------------------------------------------------------------------------------------------------------------------------------------------------------------------------------------------------------------------------------------------------------------------------------------------------------------------------------------------------------------------------------------------------------------------------------------------------------------------------------------------------------------------------------------------------------------------------------------------------------------------------|--------------------------------------------------------------------------------------------------------------------------------------------------------------------------------------------------------------------------------------------------------------------------------------------------------------------------------------------------------------------------------------------------------------------------------------------------------------------------------------------------------------------------------------------------------------------------------------------------------------------------------------------------------------------------------------------------------------------------------------------------------------------------------------------------------------------------------------------------------------------------------------------------------------------------------------------------------------------------------------------------------------------------------------------------------------------------------------------|
| <b>cVolume</b> | L superior frontal (0.048, -3.255)*<br>L pars orbitalis (0.048, -3.060)*<br>L caudal anterior cingulate (0.048, -3.022)*<br>R insula (0.048, -3.125)*                                                                                                                                                                                                                                                                                                                                                                                                                                                                                                                                                                                                                                                                                                                                                                                                                                                           |                                                                                                                                                                                                                                                                                                                                                                                                                                                                                                                                                                                                                                                                                                                                                                                                                                                                                                                                                                                                                                                                                            |
| <b>WM ND</b>   | L ATR (0.017, -2.891)*<br>L CAB (0.023, -2.352)*<br>L CCG (0.028, -2.239)*<br>L CST (0.017, -3.176)*<br>L IFOF (0.018, -2.651)*<br>L ILF (0.019, -2.474)*<br>L SLF (0.019, -2.577)*<br>L SLFT (0.019, -2.540)*<br>L UNC (0.019, -2.507)*<br>Fmajor (0.017, -2.805)*                                                                                                                                                                                                                                                                                                                                                                                                                                                                                                                                                                                                                                                                                                                                             | R ATR (0.017, -2.808)*<br>R CAB (0.019, -2.488)*<br>R CST (0.017, -3.042)*<br>R IFOF (0.017, -2.722)*<br>R ILF (0.019, -2.529)*<br>R SLF (0.017, -2.752)*<br>R SLFT (0.017, -2.783)*<br>R UNC (0.019, -2.434)*<br>Fminor (0.017, -2.788)*                                                                                                                                                                                                                                                                                                                                                                                                                                                                                                                                                                                                                                                                                                                                                                                                                                                  |
| <b>WM OD</b>   | L ATR (0.007, -3.009)**<br>L CAB (0.007, -2.986)**<br>L CCG (0.002, -4.041)**<br>L CST (0.007, -3.014)**<br>L IFOF (0.007, -3.133)**<br>L ILF (0.015, -2.511)*<br>L SLF (0.007, -2.993)**<br>L UNC (0.008, -2.871)**<br>L SLFT (0.008, -2.911)**<br>Fmajor (0.014, -2.588)*                                                                                                                                                                                                                                                                                                                                                                                                                                                                                                                                                                                                                                                                                                                                     | R ATR (0.011, -2.702)*<br>R CAB (0.007, -3.150)**<br>R CCG (0.007, -3.384)**<br>R CST (0.021, -2.351)*<br>R IFOF (0.010, -2.787)*<br>R ILF (0.022, -2.324)*<br>R SLF (0.007, -3.093)**<br>R SLFT (0.011, -2.725)*<br>R UNC (0.014, -2.549)*<br>Fminor (0.007, -3.058)**                                                                                                                                                                                                                                                                                                                                                                                                                                                                                                                                                                                                                                                                                                                                                                                                                    |
| <b>GM ND</b>   | L caudal anterior cingulate (0.045, -2.543)*<br>L fusiform (0.045, -2.525)*<br>L isthmus cingulate (0.036, -3.319)*<br>L lateral orbitofrontal (0.039, -2.842)*<br>L lingual (0.041, -2.643)*<br>L medial orbitofrontal (0.041, -2.638)*<br>L parahippocampal (0.039, -2.827)*<br>L paracentral (0.048, -2.402)*<br>L pars opercularis (0.046, -2.476)*<br>L pericalcarine (0.041, -2.670)*<br>L posterior cingulate (0.048, -2.378)*<br>L precuneus (0.045, -2.553)*<br>L rostral anterior cingulate (0.036, -3.166)*<br>L transverse temporal (0.048, -2.392)*<br>L insula (0.041, -2.619)*                                                                                                                                                                                                                                                                                                                                                                                                                   | L amygdala (0.039, -2.861)*<br>L hippocampus (0.036, -3.012)*<br>L putamen (0.036, -3.081)*<br>L thalamus proper (0.036, -3.168)*<br>R banks of the superior temporal sulcus (0.048, -2.407)*<br>R fusiform (0.036, -3.171)*<br>R lateral orbitofrontal (0.045, -2.499)*<br>R pars opercularis (0.041, -2.671)*<br>R pars triangularis (0.045, -2.517)*<br>R precuneus (0.048, -2.448)*<br>R insula (0.041, -2.664)*<br>R amygdala (0.041, -2.717)*<br>R hippocampus (0.036, -2.964)*<br>R putamen (0.041, -2.769)*<br>R thalamus proper (0.036, -3.015)*                                                                                                                                                                                                                                                                                                                                                                                                                                                                                                                                  |
| <b>GM OD</b>   | L caudal anterior cingulate (0.016, -3.262)*<br>L caudal middle frontal (0.047, -2.176)*<br>L entorhinal (0.020, -2.839)*<br>L fusiform (0.027, -2.570)*<br>L isthmus cingulate (0.017, -3.041)*<br>L lateral orbitofrontal (0.038, -2.340)*<br>L lingual (0.030, -2.461)*<br>L medial orbitofrontal (0.023, -2.778)*<br>L middle temporal (0.046, -2.225)*<br>L paracentral (0.017, -3.025)*<br>L pars opercularis (0.046, -2.209)*<br>L pars orbitalis (0.046, -2.211)*<br>L pars triangularis (0.030, -2.469)*<br>L posterior cingulate (0.016, -3.832)*<br>L precentral (0.020, -2.849)*<br>L precuneus (0.023, -2.743)*<br>L rostral anterior cingulate (0.020, -2.875)*<br>L rostral middle frontal (0.020, -2.862)*<br>L superior frontal (0.016, -3.325)*<br>L superior temporal (0.039, -2.317)*<br>L temporal pole (0.023, -2.764)*<br>L insula (0.030, -2.459)*<br>L amygdala (0.016, -3.593)*<br>L hippocampus (0.025, -2.637)*<br>L putamen (0.016, -3.228)*<br>L thalamus proper (0.016, -3.282)* | R banks of the superior temporal sulcus (0.030, -2.502)*<br>R caudal anterior cingulate (0.016, -3.182)*<br>R caudal middle frontal (0.050, -2.150)*<br>R entorhinal (0.019, -2.941)*<br>R fusiform (0.016, -3.117)*<br>R lateral orbitofrontal (0.025, -2.645)*<br>R medial orbitofrontal (0.037, -2.364)*<br>R middle temporal (0.025, -2.666)*<br>R parahippocampal (0.028, -2.531)*<br>R pars opercularis (0.046, -2.198)*<br>R pars orbitalis (0.025, -2.684)*<br>R pars triangularis (0.025, -2.625)*<br>R postcentral (0.027, -2.556)*<br>R posterior cingulate (0.030, -2.461)*<br>R precentral (0.024, -2.713)*<br>R rostral anterior cingulate (0.017, -3.007)*<br>R rostral middle frontal (0.043, -2.259)*<br>R superior frontal (0.019, -2.921)*<br>R superior temporal (0.017, -3.078)*<br>R supra marginal (0.031, -2.440)*<br>R temporal pole (0.042, -2.275)*<br>R transverse temporal (0.038, -2.332)*<br>R insula (0.025, -2.657)*<br>R amygdala (0.016, -3.516)*<br>R hippocampus (0.025, -2.613)*<br>R putamen (0.016, -3.134)*<br>R thalamus proper (0.016, -3.150)* |

WM: white matter, GM: gray matter, ND: neurite density index, OD: orientation dispersion index, cVolume: cortical volume, ATR: anterior thalamic radiations, CAB: cingulum angular bundle, CCG: cingulum cingulate gyrus bundle, CST: corticospinal tract, Fmajor: corpus callosum forceps major, Fminor: corpus callosum forceps minor, IFOF: inferior fronto-occipital fasciculus, ILF: inferior longitudinal fasciculus, SLF: superior longitudinal fasciculus, SLFT: superior longitudinal fasciculus temporal, UNC: uncinata fasciculus.

\*: FDR-p<0.05

\*\* : FDR-p<0.01

**Table S2. The classification performance for all classifiers.**

| Measure      | ACC   | SEN | SPE | F-score |
|--------------|-------|-----|-----|---------|
| <b>WM OD</b> | 90%   | 95% | 65% | 0.941   |
| <b>WM ND</b> | 85%   | 96% | 30% | 0.914   |
| <b>GM OD</b> | 82.7% | 94% | 20% | 0.895   |
| <b>GM ND</b> | 86.7% | 96% | 40% | 0.922   |
| <b>RD</b>    | 77.5% | 89% | 20% | 0.866   |
| <b>MD</b>    | 80%   | 95% | 5%  | 0.887   |
| <b>FA</b>    | 72.5% | 86% | 5%  | 0.836   |

|                  |       |     |     |       |
|------------------|-------|-----|-----|-------|
| <b>AD</b>        | 79.2% | 93% | 10% | 0.879 |
| <b>Thickness</b> | 77.5% | 92% | 5%  | 0.872 |
| <b>Area</b>      | 77.5% | 93% | 0%  | 0.872 |
| <b>cVolume</b>   | 80.8% | 97% | 0%  | 0.894 |
| <b>scVolume</b>  | 80.8% | 92% | 25% | 0.888 |
| <b>Volume WM</b> | 80.8% | 96% | 5%  | 0.893 |
| <b>Curvature</b> | 80.8% | 97% | 0%  | 0.894 |

ACC: accuracy, SEN: sensitivity, SPE: specificity, F-score: F1 score, accuracy, L: left hemisphere; R: right hemisphere. cVolume: cortical volume, WM: white matter, GM: gray matter, ND: neurite density index, OD: orientation dispersion index, RD: radial diffusivity, MD: mean diffusivity, FA: fractional anisotropy, AD: axial diffusivity, Thickness: cortical thickness, Area: cortical surface area, cVolume: cortical volume, scVolume: subcortical volume, Curvature: mean curvature.
